# Supplementary material
Source: PubMed Central journal article supplement (PMC4836231)
Supplement: JB.00055-16_zjb999094022so1.pdf [file JB.00055-16_zjb999094022so1.pdf]

## Appendix

**Table A1. Interaction partners found for NorB, NorC and NosR involved in the respiratory chains and other crucial cellular processes.** For experimental details consult Table 1 and the experimental procedures section.

| PA N°                                                | Interaction Partners                                                          | NorB         | NorC          | NosR         |
|------------------------------------------------------|-------------------------------------------------------------------------------|--------------|---------------|--------------|
| <b>1. Primary dehydrogenases (electron donating)</b> |                                                                               |              |               |              |
| PA2638                                               | NADH dehydrogenase subunit B NuoB                                             | 3.59         | <b>29.01</b>  | <b>11.47</b> |
| PA2639                                               | NADH:dehydrogenase NuoD                                                       | <b>16.63</b> | <b>148.76</b> | <b>19.72</b> |
| PA2644                                               | NADH dehydrogenase subunit I Nuol                                             | 3.40         | <b>18.98</b>  | <b>7.62</b>  |
| PA2951                                               | Electron transfer flavoprotein alpha-subunit EtfA                             | 0.70         | 0.97          | ND           |
| PA2952                                               | Electron transfer flavoprotein beta-subunit EtfB                              | 0.51         | 1.21          | ND           |
| PA4771                                               | L-lactate dehydrogenase LldD                                                  | 0.89         | <b>11.33</b>  | ND           |
| PA0782                                               | Bifunctional proline dehydrogenase/pyrroline-5-carboxylate dehydrogenase PutA | 0.74         | <b>17.03</b>  | 4.03         |
| PA4640                                               | Malate:quinone oxidoreductase MqoB                                            | 1.75         | <b>6.63</b>   | ND           |
| PA5304                                               | D-amino acid dehydrogenase small subunit DadA                                 | 0.33         | <b>3.09</b>   | 1.12         |
| PA1583                                               | Succinate dehydrogenase flavoprotein subunit SdhA                             | 4.01         | <b>12.38</b>  | 4.08         |
| PA1584                                               | Succinate dehydrogenase Fe-S-subunit SdhB                                     | 7.60         | <b>17.30</b>  | 6.00         |
| PA1582                                               | Succinate dehydrogenase D subunit SdhD                                        | ND           | <b>5.78</b>   | 3.04         |
| <b>2 ATP synthase</b>                                |                                                                               |              |               |              |
| PA5556                                               | F0F1 ATP synthase subunit alpha AtpA                                          | 0.87         | <b>4.43</b>   | 1.92         |
| PA5558                                               | F0F1 ATP synthase subunit B AtpF                                              | 1.27         | <b>3.49</b>   | 2.60         |
| PA5553                                               | F0F1 ATP synthase subunit epsilon AtpC                                        | 1.67         | <b>9.69</b>   | 3.70         |
| PA5554                                               | F0F1 ATP synthase subunit beta AtpD                                           | 1.32         | <b>6.76</b>   | 2.25         |
| PA5555                                               | F0F1 ATP synthase subunit gamma AtpG                                          | 1.13         | <b>7.52</b>   | ND           |
| PA5557                                               | F0F1 ATP synthase subunit delta AtpH                                          | 0.24         | <b>2.83</b>   | 1.40         |

| <b>3 Cytochrome oxidases</b> |                                                                          |              |              |       |
|------------------------------|--------------------------------------------------------------------------|--------------|--------------|-------|
| PA1552                       | Cytochrome <i>c</i> oxidase, <i>cbb</i> <sub>3</sub> -type, CcoP subunit | 0.96         | 1.43         | ND    |
| PA1553                       | Cytochrome <i>c</i> oxidase, <i>cbb</i> <sub>3</sub> -type, CcoO subunit | 0.88         | 2.46         | 2.02  |
| PA1554                       | Cytochrome oxidase subunit ( <i>cbb</i> <sub>3</sub> -type) CcoN1        | ND           | 6.17         | ND    |
| PA4429                       | Putative cytochrome <i>c</i> <sub>1</sub> precursor                      | 0.42         | 1.44         | 0.97  |
| PA5300                       | Cytochrome <i>c</i> <sub>5</sub> CycB                                    | 0.45         | 0.69         | ND    |
| PA5490                       | Cytochrome <i>c</i> <sub>4</sub> precursor Cc4                           | 0.52         | 1.17         | 2.24  |
| <b>4 Fermentation</b>        |                                                                          |              |              |       |
| PA0835                       | Phosphate acetyltransferase Pta                                          | 1.43         | <b>4.22</b>  | ND    |
| PA5427                       | Alcohol dehydrogenase AdhA                                               | 0.42         | <b>4.94</b>  | ND    |
| PA0888                       | Arginine/ornithine binding protein AotJ                                  | 0.29         | 0.55         | ND    |
| PA5171                       | Arginine deiminase ArcA                                                  | 2.14         | <b>3.09</b>  | ND    |
| PA5172                       | Ornithine carbamoyltransferase ArcB                                      | 3.80         | <b>3.69</b>  | ND    |
| <b>5 Cofactor formation</b>  |                                                                          |              |              |       |
| PA3813                       | Scaffold protein IscU                                                    | 1.73         | 2.17         | 0.63  |
| PA3814                       | Cysteine desulfurase IscS                                                | 1.33         | 2.63         | ND    |
| PA1479                       | Cytochrome <i>c</i> -type biogenesis protein CcmE                        | 2.08         | <b>4.20</b>  | 2.14  |
| PA1483                       | Cytochrome <i>c</i> -type biogenesis protein Cych                        | 1.44         | <b>40.78</b> | ND    |
| PA3977                       | Glutamate-1-semialdehyde aminotransferase HemL                           | 3.76         | <b>29.64</b> | ND    |
| PA5243                       | Delta-aminolevulinic acid dehydratase HemB                               | 0.38         | 1.95         | ND    |
| PA1546                       | Coproporphyrinogen III oxidase HemN                                      | 0.31         | <b>10.32</b> | 2.65  |
| PA0024                       | Coproporphyrinogen III oxidase HemF                                      | 1.49         | <b>11.99</b> | ND    |
| PA5257                       | Heme biosynthesis associated protein PA5257                              | 3.41         | <b>18.98</b> | ND    |
| PA5258                       | Potential enzyme of heme biosynthesis HemX                               | 0.89         | <b>6.71</b>  | 2.52  |
| PA3915                       | Molybdopterin biosynthetic protein B1 MoaB1                              | 2.81         | <b>16.59</b> | 9.00  |
| PA5063                       | Ubiquinone/menaquinone biosynthesis methyltransferase UbiE               | 0.89         | <b>13.05</b> | ND    |
| PA0546                       | S-adenosylmethionine synthetase MetK                                     | 0.94         | 2.74         | ND    |
| <b>6 Cell division</b>       |                                                                          |              |              |       |
| PA4751                       | Cell division protein FtsH                                               | <b>30.05</b> | <b>76.99</b> | 19.69 |
| PA4408                       | Cell division protein FtsA                                               | 1.82         | 4.98         | ND    |
| PA1528                       | Cell division protein ZipA                                               | <b>13.88</b> | <b>54.62</b> | ND    |
| PA5037                       | Potential cell division protein                                          | 5.39         | <b>27.55</b> | 9.64  |
| PA4407                       | Cell division protein FtsZ                                               | 3.04         | <b>11.54</b> | 1.48  |
| PA3244                       | Cell division inhibitor MinD                                             | 2.55         | 7.07         | ND    |

|        |                                                     |      |              |      |
|--------|-----------------------------------------------------|------|--------------|------|
| PA1847 | Potential iron-sulfur cluster assembly protein NfuA | 2.61 | <b>5.27</b>  | ND   |
| PA4481 | Rod-shape-determining protein MreB                  | 6.59 | <b>23.13</b> | 7.46 |

### 7 TCA cycle and pyruvate knot

|        |                                                                        |              |              |      |
|--------|------------------------------------------------------------------------|--------------|--------------|------|
| PA1770 | Phosphoenolpyruvate synthase PpsA                                      | 1.09         | 3.04         | ND   |
| PA5192 | Phosphoenolpyruvate carboxykinase PckA                                 | 1.09         | 2.79         | ND   |
| PA3635 | Phosphopyruvate hydratase Eno                                          | 1.28         | 1.96         | ND   |
| PA4329 | Pyruvate kinase PykA                                                   | <b>7.11</b>  | <b>12.42</b> | ND   |
| PA5015 | Pyruvate dehydrogenase subunit E1 AceE                                 | 1.55         | <b>5.19</b>  | ND   |
| PA4848 | Acetyl-CoA carboxylase biotin carboxylase subunit AccC                 | 3.93         | <b>8.47</b>  | 1.72 |
| PA3112 | Acetyl-CoA carboxylase subunit beta AccD                               | <b>19.11</b> | <b>23.44</b> | 4.64 |
| PA3639 | Acetyl-CoA carboxylase carboxyltransferase subunit alpha AccA          | <b>15.90</b> | <b>12.76</b> | ND   |
| PA1587 | Dihydrolipoamide dehydrogenase Lpd                                     | 3.54         | <b>6.26</b>  | ND   |
| PA1580 | Type II citrate synthase GltA                                          | 0.71         | 3.45         | ND   |
| PA1562 | Aconitate hydratase AcnA                                               | 0.73         | 1.44         | ND   |
| PA1787 | Bifunctional aconitate hydratase 2/2-methylisocitrate dehydratase AcnB | 0.55         | 3.61         | 0.72 |
| PA2623 | Isocitrate dehydrogenase Icd                                           | 0.30         | 1.03         | ND   |
| PA2634 | Isocitrate lyase AceA                                                  | 2.58         | ND           | ND   |
| PA2624 | Isocitrate dehydrogenase Idh                                           | 1.27         | 2.96         | ND   |
| PA5016 | Dihydrolipoamide acetyltransferase AceF                                | <b>9.06</b>  | 18.79        | ND   |
| PA1585 | 2-oxoglutarate dehydrogenase E1 component SucA                         | <b>9.14</b>  | <b>30.46</b> | ND   |
| PA1586 | Dihydrolipoamide succinyltransferase SucB                              | 2.30         | <b>8.79</b>  | ND   |
| PA1588 | Succinyl-CoA synthetase subunit beta SucC                              | 2.11         | 6.15         | 1.27 |
| PA1589 | Succinyl-CoA synthetase subunit alpha SucD                             | 0.72         | 2.50         | 0.54 |

### 8 Cell wall/membrane/envelope

|        |                                                                     |              |              |              |
|--------|---------------------------------------------------------------------|--------------|--------------|--------------|
| PA4749 | Phosphoglucosamine mutase GlmM                                      | 0.90         | 3.62         | 1.90         |
| PA5077 | Gucosyltransferase MdoH                                             | 1.09         | <b>17.85</b> | <b>10.85</b> |
| PA4460 | Periplasmic LPS transport OstA                                      | <b>13.60</b> | <b>36.42</b> | <b>20.34</b> |
| PA3299 | Acyl-CoA synthetase FadD1                                           | <b>11.48</b> | <b>23.92</b> | <b>6.54</b>  |
| PA3148 | UDP-N-acetylglucosamine 2-epimerase WbpL                            | 3.38         | <b>22.32</b> | 4.62         |
| PA2966 | Acyl carrier protein AcpP                                           | <b>6.57</b>  | <b>18.88</b> | ND           |
| PA5134 | Putative carboxyl-terminal protease CtpA                            | 4.13         | <b>5.08</b>  | 0.70         |
| PA0425 | RND multidrug efflux membrane fusion protein MexA                   | 2.11         | 2.96         | 1.06         |
| PA3692 | Outer membrane protein precursor LptF                               | 2.17         | <b>7.34</b>  | ND           |
| PA3158 | Oxidoreductase WbpB                                                 | 0.95         | <b>8.86</b>  | ND           |
| PA3999 | D-ala-D-ala-carboxypeptidase DacC                                   | <b>5.19</b>  | <b>10.72</b> | ND           |
| PA1777 | Major porin and structural outer membrane porin OprF precursor OprF | 0.08         | 0.14         | 0.07         |
| PA3159 | UDP-glucose/GDP-mannose dehydrogenase WbpA                          | 2.64         | <b>22.78</b> | 1.21         |

|        |                                                                 |      |              |      |
|--------|-----------------------------------------------------------------|------|--------------|------|
| PA5475 | Hypothetical protein PA5475                                     | 1.58 | <b>18.57</b> | 3.02 |
| PA0070 | Outer membrane lipoprotein TagQ1                                | 0.10 | 1.67         | 0.24 |
| PA0745 | Enoyl-CoA hydratase                                             | 5.31 | 5.19         | 1.23 |
| PA3014 | Multifunctional fatty acid oxidation complex subunit alpha FaoA | 1.33 | 4.17         | ND   |
| PA2968 | Malonyl-CoA-[acyl-carrier-protein] transacylase FabD            | 2.36 | 3.27         | ND   |
| PA2967 | 3-ketoacyl-(acyl-carrier-protein) reductase FabG                | 2.31 | 3.79         | 0.68 |
| PA1609 | 3-oxoacyl-(acyl carrier protein) synthase I FabB                | 1.72 | 3.80         | ND   |

### 9 Chemotaxis/motility

|        |                                                          |              |              |      |
|--------|----------------------------------------------------------|--------------|--------------|------|
| PA0413 | Component of chemotactic signal transduction system ChpA | <b>11.00</b> | <b>58.67</b> | 8.18 |
| PA1457 | Chemotaxis protein CheZ                                  | 3.39         | 41.83        | 7.32 |
| PA1458 | Two-component sensor CheA                                | 3.11         | <b>22.24</b> | ND   |
| PA2788 | Putative chemotaxis transducer                           | 1.75         | <b>19.01</b> | 4.38 |
| PA4307 | Chemotactic transducer PctC                              | 2.07         | <b>13.99</b> | 2.83 |
| PA2654 | Putative chemotaxis transducer                           | 1.92         | 9.42         | 2.65 |
| PA3115 | Motility protein FimV                                    | 0.59         | ND           | ND   |
| PA1092 | Flagellin type B FliC                                    | 0.18         | 0.25         | 0.15 |
| PA0411 | Twitching motility protein PilJ                          | 0.55         | 1.60         | 0.42 |
| PA4525 | Type 4 fimbrial precursor PilA                           | 2.23         | 4.92         | 1.58 |
| PA4493 | Putative two-component response regulator RoxR           | 1.94         | 8.38         | ND   |
| PA5043 | Type 4 fimbrial biogenesis protein PilN                  | 0.87         | 1.87         | ND   |
| PA1094 | Flagellar capping protein FliD                           | 2.22         | <b>8.60</b>  | ND   |
| PA3805 | Type 4 fimbrial biogenesis protein PilF                  | 0.71         | 2.30         | ND   |
| PA1179 | Two-component response regulator PhoP                    | <b>15.25</b> | <b>16.75</b> | ND   |
| PA2867 | Putative chemotaxis transducer                           | 2.74         | <b>8.19</b>  | 1.29 |
| PA2652 | Putative chemotaxis transducer                           | 1.20         | <b>7.25</b>  | 1.67 |

### 10 Protein transport

|        |                                                            |              |              |              |
|--------|------------------------------------------------------------|--------------|--------------|--------------|
| PA3822 | Preprotein translocase subunit YajC                        | <b>13.35</b> | <b>30.23</b> | <b>12.57</b> |
| PA4403 | Preprotein translocase subunit SecA                        | <b>7.55</b>  | <b>23.72</b> | <b>7.29</b>  |
| PA3821 | Preprotein translocase subunit SecD                        | 3.56         | <b>18.39</b> | <b>8.21</b>  |
| PA3820 | Preprotein translocase subunit SecE                        | 1.59         | <b>13.39</b> | 3.81         |
| PA5568 | Putative inner membrane protein translocase component YidC | 0.65         | 2.60         | 2.01         |

### 11 Amino acid metabolism

|        |                                         |               |               |              |
|--------|-----------------------------------------|---------------|---------------|--------------|
| PA4694 | Ketol-acid reductoisomerase IlvC        | <b>190.75</b> | <b>225.30</b> | <b>86.39</b> |
| PA0316 | D-3-phosphoglycerate dehydrogenase SerA | 1.27          | <b>10.61</b>  | 2.39         |

|        |                                                                                   |              |              |      |
|--------|-----------------------------------------------------------------------------------|--------------|--------------|------|
| PA3068 | NAD-dependent glutamate dehydrogenase GdhB                                        | <b>5.29</b>  | <b>48.85</b> | 8.04 |
| PA5508 | Putative glutamine synthetase PauA7                                               | 0.79         | <b>8.78</b>  | ND   |
| PA1339 | Amino acid ABC transporter ATP binding protein AatP                               | 1.53         | <b>20.61</b> | 4.15 |
| PA3814 | Cysteine desulfurase IscS                                                         | 1.33         | 2.63         | ND   |
| PA5173 | Carbamate kinase ArcC                                                             | 2.74         | 3.16         | 0.59 |
| PA0316 | D-3-phosphoglycerate dehydrogenase SerA                                           | 1.27         | <b>10.61</b> | 2.39 |
| PA5119 | Glutamine synthetase GlnA                                                         | <b>9.67</b>  | <b>9.23</b>  | 2.25 |
| PA1342 | Putative binding protein component of ABC transporter AatJ                        | <b>10.91</b> | 0.59         | 0.17 |
| PA3816 | O-acetylserine synthase CysE                                                      | 1.85         | <b>5.30</b>  | 4.05 |
| PA0895 | Bifunctional succinylornithine transaminase/acetylornithine aminotransferase AruC | 1.38         | <b>6.17</b>  | ND   |

### 12 Iron metabolism

|        |                                      |              |              |       |
|--------|--------------------------------------|--------------|--------------|-------|
| PA4764 | Ferric uptake regulation protein Fur | 7.80         | 3.53         | 1.55  |
| PA3531 | Bacterioferritin BfrB                | <b>13.60</b> | <b>27.23</b> | ND    |
| PA4235 | Bacterioferritin FtnA                | 6.07         | <b>45.75</b> | 14.20 |

### 13 Proteases/chaperones

|        |                                                                |              |              |       |
|--------|----------------------------------------------------------------|--------------|--------------|-------|
| PA4542 | ClpB protein                                                   | <b>6.28</b>  | <b>9.64</b>  | 1.17  |
| PA4941 | Protease subunit HflC                                          | <b>13.92</b> | <b>14.04</b> | 11.57 |
| PA1805 | Peptidyl-prolyl <i>cis-trans</i> isomerase D PpiD              | <b>6.29</b>  | <b>22.33</b> | 4.38  |
| PA0459 | Putative ClpA/B protease ATP binding subunit ClpC              | 3.15         | <b>8.56</b>  | 1.31  |
| PA5054 | ATP-dependent protease ATP-binding subunit HslU                | <b>18.23</b> | <b>13.06</b> | ND    |
| PA4632 | Potential Zn-dependent protease with chaperone function        | 1.60         | 1.90         | 0.69  |
| PA4760 | Chaperone protein DnaJ                                         | <b>8.84</b>  | 6.06         | ND    |
| PA1793 | Peptidyl-prolyl <i>cis-trans</i> isomerase B PpiB              | 1.62         | 4.10         | 0.63  |
| PA1802 | ATP-dependent protease ATP-binding subunit ClpX                | 2.74         | <b>11.17</b> | 3.05  |
| PA1801 | ATP-dependent Clp protease proteolytic subunit ClpP            | 0.91         | 8.76         | ND    |
| PA1800 | Trigger factor Tig                                             | 1.15         | 2.01         | 0.85  |
| PA4942 | Protease subunit HflK                                          | <b>6.51</b>  | <b>7.96</b>  | 5.62  |
| PA4386 | Co-chaperonin GroES                                            | 1.89         | <b>5.33</b>  | 1.15  |
| PA4385 | Chaperonin GroEL                                               | 0.95         | 2.27         | 0.71  |
| PA0766 | Serine protease MucD precursor                                 | 8.16         | <b>17.06</b> | ND    |
| PA3262 | Putative peptidyl-prolyl <i>cis-trans</i> isomerase, FkbP-type | 1.54         | 7.74         | 1.41  |
| PA1596 | Heat shock protein 90 HtpG                                     | 3.75         | 5.15         | 1.13  |
| PA4761 | Molecular chaperone DnaK                                       | 3.12         | 3.09         | ND    |
| PA4370 | Metalloproteinase outer membrane protein precursor IcmP        | 0.98         | 2.44         | ND    |

#### 14 Stress/detoxification

|        |                                                        |             |              |      |
|--------|--------------------------------------------------------|-------------|--------------|------|
| PA2664 | Nitric oxide dioxygenase Fhp                           | 19.04       | 8.22         | ND   |
| PA0139 | Alkyl hydroperoxide reductase subunit C AhpC           | 2.81        | 5.82         | ND   |
| PA0652 | cAMP-regulatory protein Vfr                            | <b>5.82</b> | <b>19.98</b> | 9.54 |
| PA4236 | Catalase KatA                                          | 3.19        | <b>17.03</b> | ND   |
| PA2582 | Activator of osmoprotectant ProP                       | 5.50        | <b>17.69</b> | 5.47 |
| PA0456 | Putative cold-shock protein                            | 2.71        | 5.16         | 1.57 |
| PA3309 | Universal stress protein UspK                          | <b>7.87</b> | <b>11.42</b> | 6.22 |
| PA4352 | Universal stress protein UspA                          | 2.07        | <b>5.69</b>  | ND   |
| PA4762 | Heat shock protein GrpE                                | 3.17        | 3.19         | ND   |
| PA1561 | Aerotaxis receptor Aer                                 | 2.50        | <b>16.48</b> | 3.24 |
| PA2582 | Potential activator of osmoprotectant transporter ProP | 5.50        | <b>17.69</b> | 5.47 |

#### 15 DNA/RNA metabolism

|        |                                                              |             |              |      |
|--------|--------------------------------------------------------------|-------------|--------------|------|
| PA1155 | Ribonucleotide-diphosphate reductase (Nrd) subunit beta NrdB | 0.08        | 3.24         | 1.07 |
| PA1156 | Ribonucleotide-diphosphate reductase subunit alpha NrdA      | 0.65        | 7.27         | 1.37 |
| PA5497 | NrdJa                                                        | 0.23        | 4.78         | 1.20 |
| PA5496 | NrdJb                                                        | 0.29        | 5.10         | 1.15 |
| PA3637 | CTP synthetase PyrG                                          | <b>5.94</b> | <b>9.26</b>  | ND   |
| PA3770 | Inosine 5'-monophosphate dehydrogenase GuaB                  | 4.25        | <b>5.66</b>  | ND   |
| PA4670 | Ribose-phosphate pyrophosphokinase Prs                       | <b>8.94</b> | <b>12.94</b> | ND   |
| PA3168 | DNA gyrase subunit A GyrA                                    | 1.87        | <b>7.54</b>  | ND   |
| PA0004 | DNA gyrase subunit B GyrB                                    | 3.05        | <b>20.06</b> | 6.46 |
| PA5562 | Chromosome partitioning protein Spo0J                        | 2.35        | <b>10.20</b> | ND   |
| PA3940 | Putative DNA binding protein                                 | 0.26        | ND           | ND   |
| PA3617 | Recombinase A RecA                                           | 2.64        | 8.76         | 3.08 |
| PA0428 | Putative ATP-dependent RNA helicase RhIE                     | 3.52        | <b>21.93</b> | 5.80 |
| PA4232 | Single-stranded DNA-binding protein Ssb                      | 4.12        | <b>10.40</b> | 1.96 |
| PA3266 | Cold acclimation protein B CapB                              | 3.74        | <b>6.89</b>  | 3.43 |
| PA5239 | Transcription termination factor Rho                         | 4.74        | <b>10.61</b> | 2.61 |
| PA4270 | DNA-directed RNA polymerase subunit beta RpoB                | 2.68        | <b>12.60</b> | 2.65 |
| PA4238 | DNA-directed RNA polymerase subunit alpha RpoA               | 3.39        | <b>8.86</b>  | 1.78 |
| PA4269 | DNA-directed RNA polymerase subunit beta' RpoC               | 2.97        | <b>16.96</b> | 3.18 |

---
